# Supplementary material for: Multichannel pathway-enriched mesoporous NiO nanocuboids for the highly sensitive and selective detection of 3-hydroxy-2-butanone biomarkers
Source: Royal Society of Chemistry journal article supplement (doi:10.1039/c9ta01013k), 2019-01-01
Supplement: c9ta01013k1.pdf [file c9ta01013k1.pdf]

## *Electronic Supplementary Information*

### **Multichannel Pathways-Enriched Mesoporous NiO Nanocuboids for Highly Sensitive and Selective Detection of 3-Hydroxy-2-Butanone Biomarkers**

Zhengyou Zhu, Lijun Zheng, Shizheng Zheng, Jian Chen, Xiaxia Xing, Dongliang Feng and Dachi Yang \*

Tianjin Key Laboratory of Optoelectronic Sensor and Sensing Network Technology and Department of Electronics, College of Electronic Information and Optical Engineering, Nankai University, Tianjin 300350, P. R. China

\*Corresponding E-mail: yangdachi@nankai.edu.cn

#### **Outline**

**Figure S1** Large-scale as synthesized M-NiO NCs (a) and the corresponding EDS spectra (b) and element mapping of C (c), Ni (d) and O (e), respectively.

**Figure S2** TEM images, grain size distribution and pore size distribution of M-NiO NCs after long-term stability test.

**Figure S3** Linear fitting curve of the sensitivity with 3H-2B concentration (ppm) at 120 °C;

**Figure S4** Response and recovery times of M-NiO NCs sensor to 50 (a and c) and 10 ppm (b and d) of 3H-2B at 120 (a and b) and 220 °C (c and d), respectively.

**Figure S5** (a) Sensing response of M-NiO NCs to various concentrations of 3H-2B and (b) Reproducibility to 100 ppm successive target gas at 220 °C.

**Figure S6** XPS spectra of the M-NiO NCs samples after exposure to air and 3H-2B at 120 °C for 0.5 h. (a) Ni 2p spectra and (b) C 1s spectra.

**Figure S7** The color change of M-NiO NCs sensors after exposing to different concentrations of 3H-2B gas at 120 °C. The photos were taken when the sensors' signals reached saturation, after exposure time of 278, 242, 135, 110 and 99 s in 5, 10, 25, 50 and 100 ppm 3H-2B, respectively.

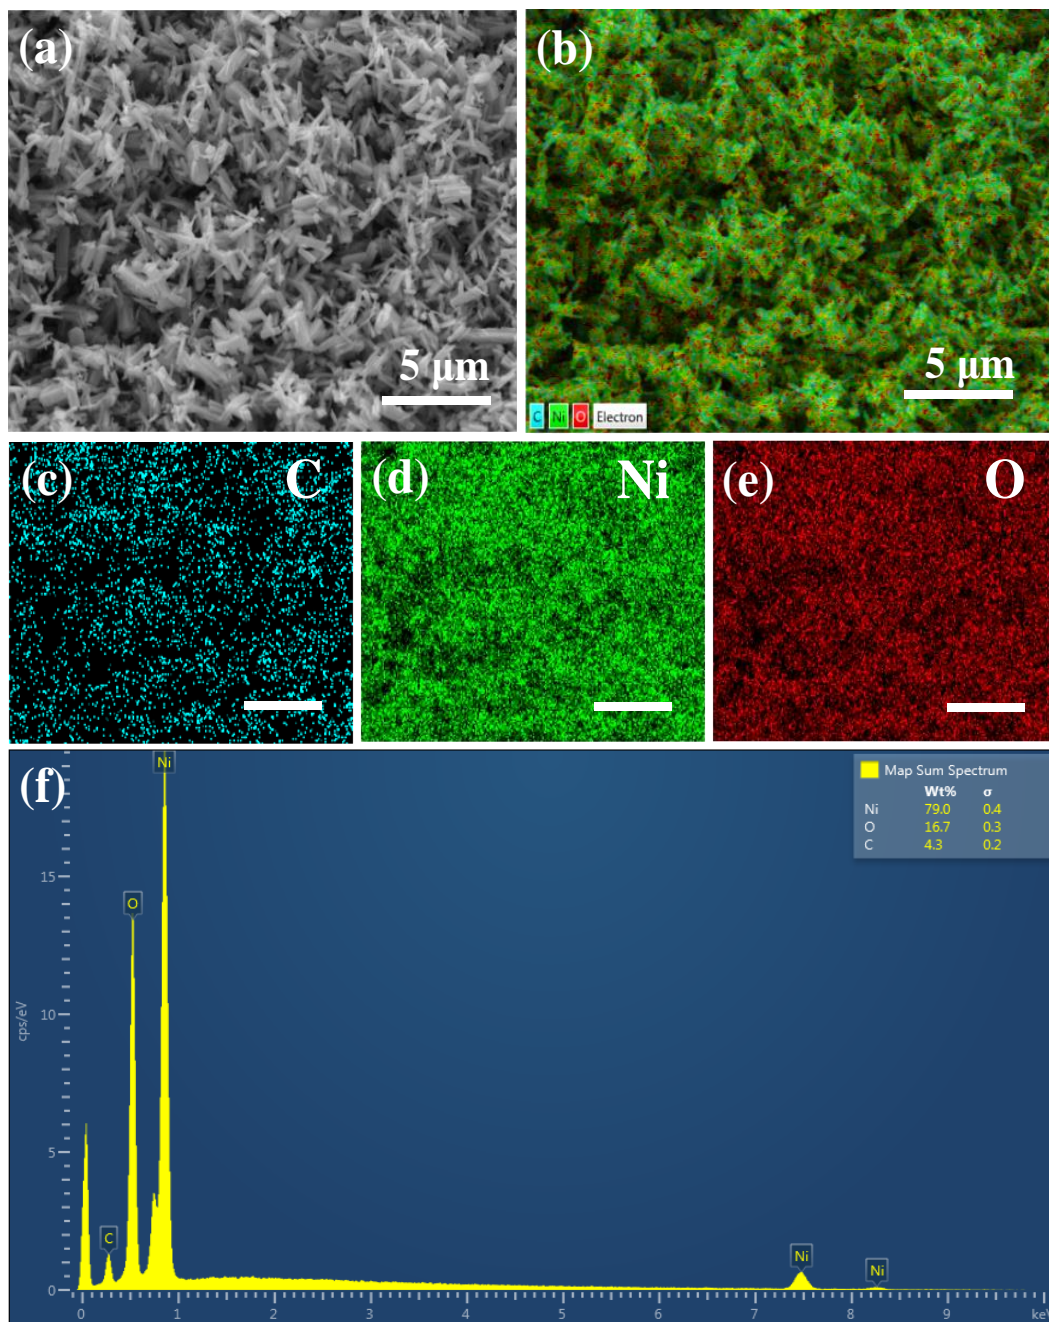

**Figure S1** Large-scale synthesis of M-NiO NCs (a) and the corresponding element mapping of C (c), Ni (d) O (e), and EDS spectra (f), respectively.

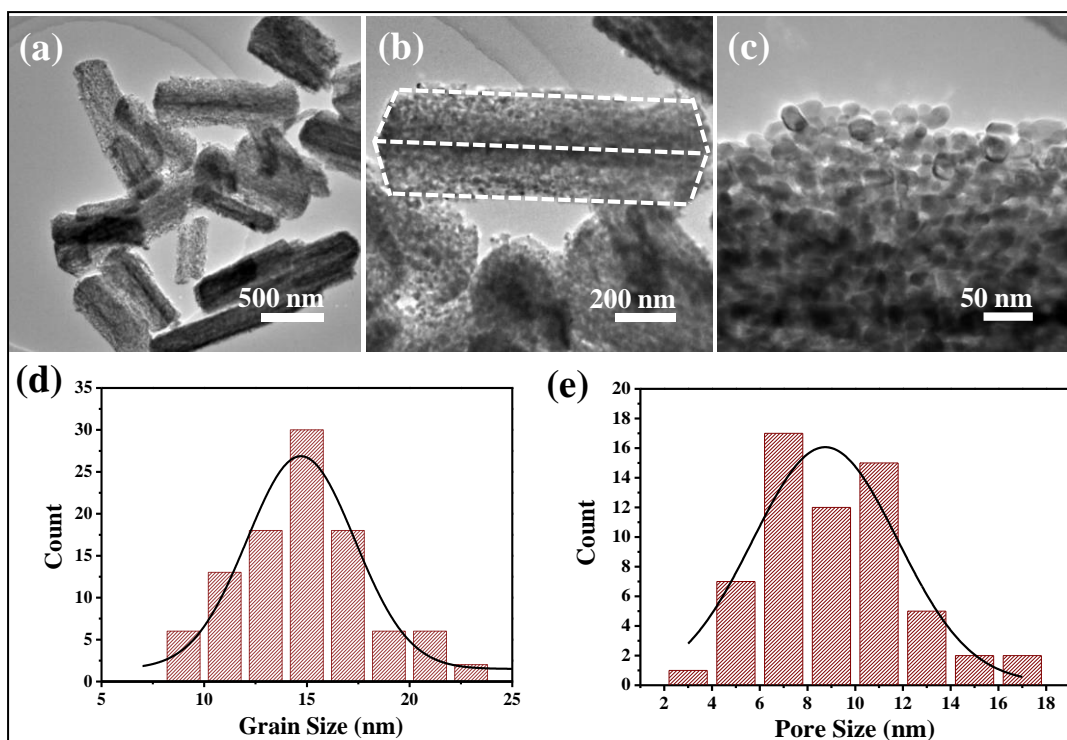

**Figure S2** TEM images, grain size distribution and pore size distribution of M-NiO NCs after long-term stability test.

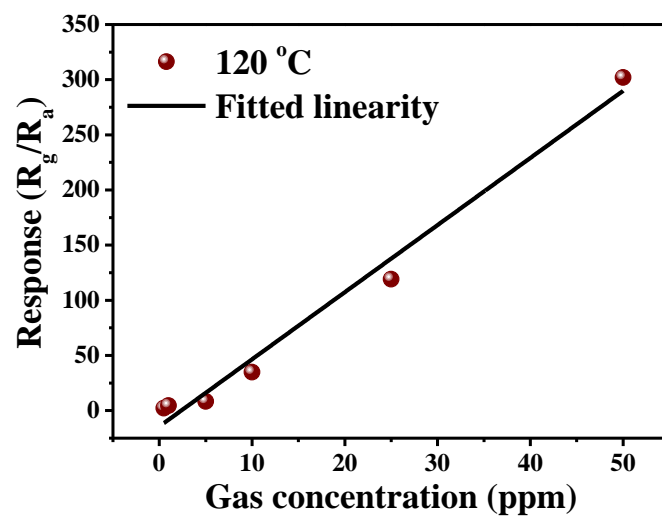

**Figure S3** Linear fitting curve of the sensitivity with 3H-2B concentration (ppm) at 120 °C;

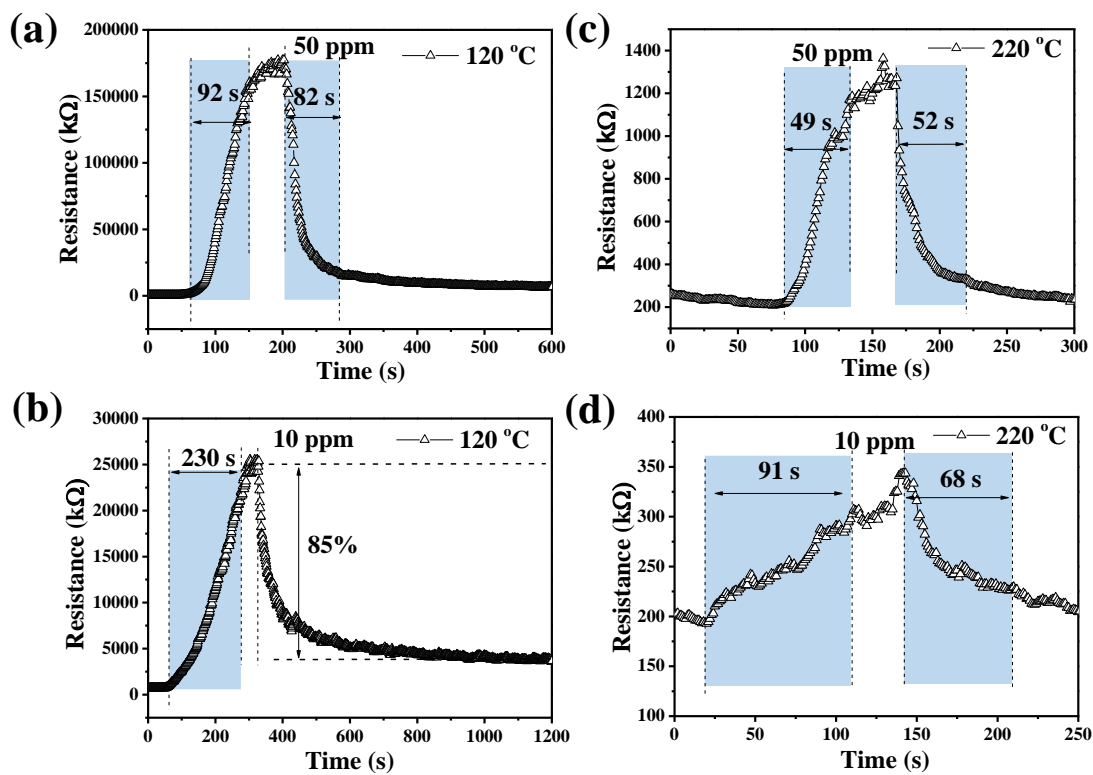

**Figure S4** Response and recovery times of M-NiO NCs sensor to 50 (a and c) and 10 ppm (b and d) of 3H-2B at 120 (a and b) and 220 °C (c and d), respectively.

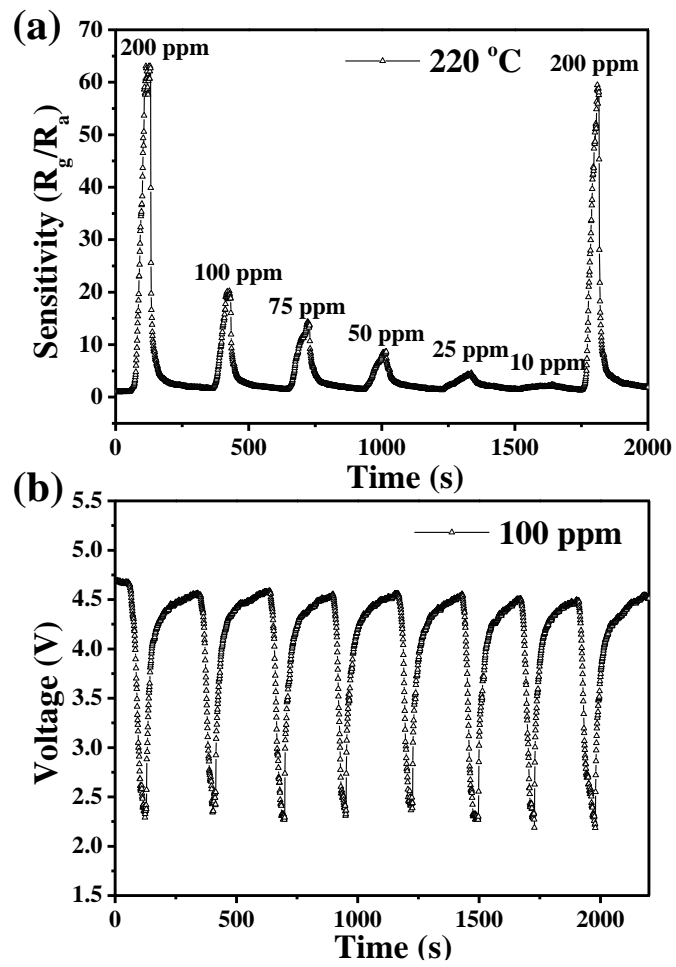

**Figure S5** (a) Sensing response of M-NiO NCs to various concentrations of 3H-2B and (b) Reproducibility to 100 ppm successive target gas at 220 °C.

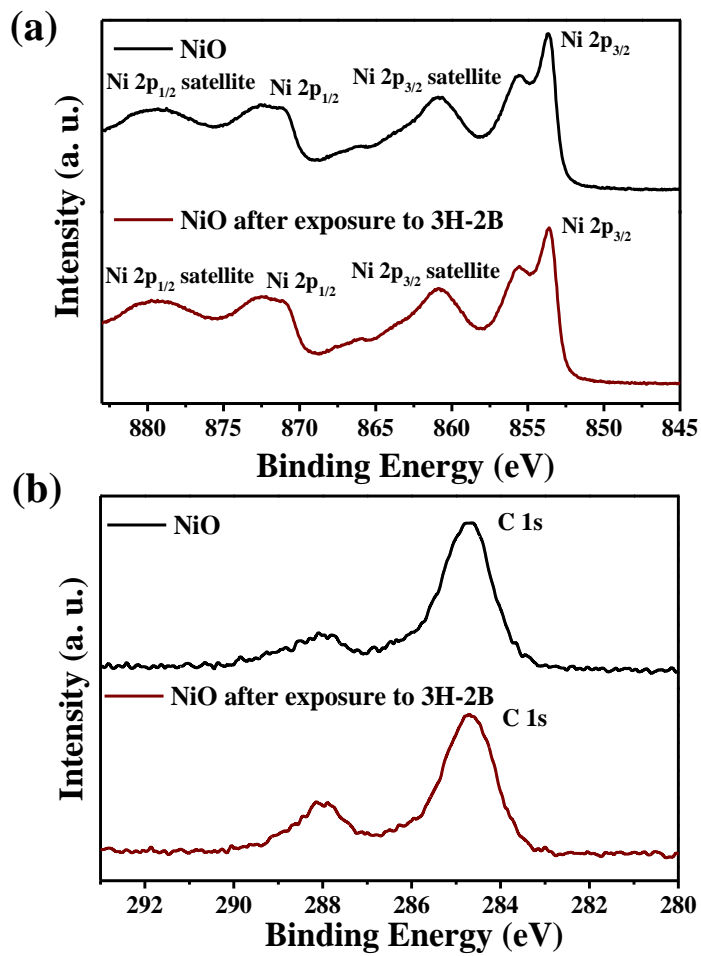

**Figure S6** XPS spectra of the M-NiO NCs samples after exposure to air and 3H-2B at 120 °C for 30 min. (a) Ni 2p spectra and (b) C 1s spectra.



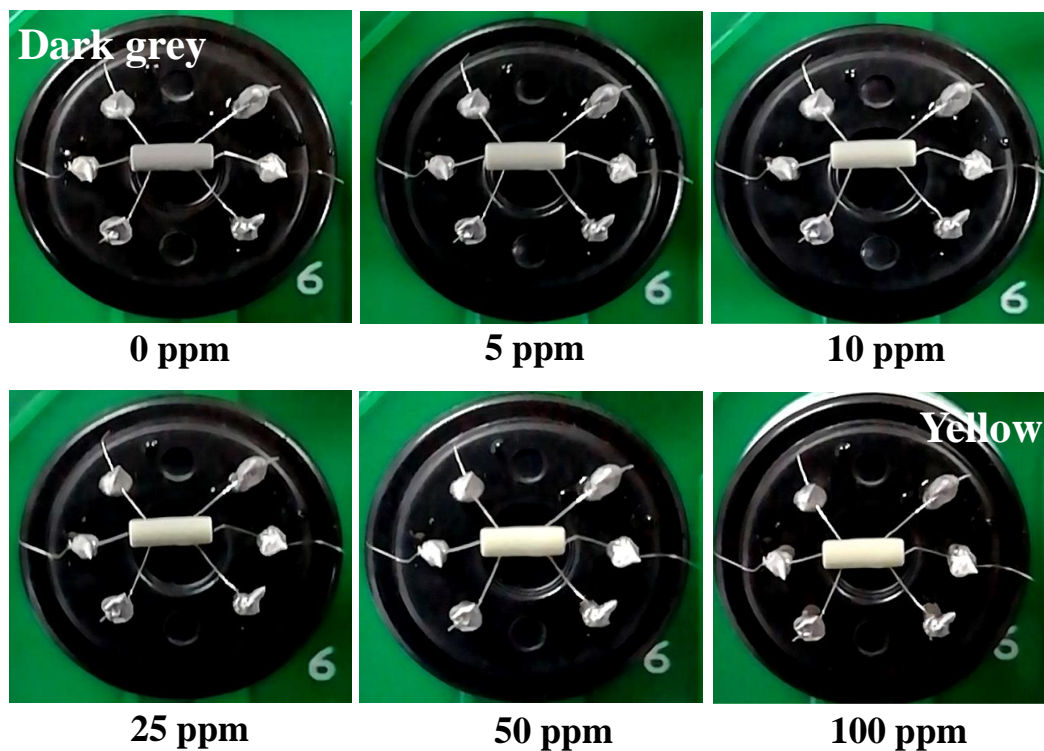

**Figure S7** The color change of M-NiO NCs sensors after exposing to different concentrations of 3H-2B gas at 120 °C. The photos were taken when the sensors' signals reached saturation, after exposure time of 278, 242, 135, 110 and 99 s in 5, 10, 25, 50 and 100 ppm 3H-2B, respectively.
